# Supplementary material
Source: MDPI journal article supplement (https://www.mdpi.com/2313-0105/9/8/406)
Supplement: s1 [file s1]

## Supplementary Materials

### The Impact of Graphene in Na<sub>2</sub>FeP<sub>2</sub>O<sub>7</sub>/C/Reduced Graphene Oxide Composite Cathode for Sodium-Ion batteries

Inara Nesterova, Liga Britala, Anatolijs Sarakovskis, Beate Kruze, Gunars Bajars, Gints Kucinskis

**Table S1.** Results of the Rietveld refinement of NFP XRD data

|                      | a, Å      | b, Å      | c, Å       | $\alpha$ , ° | $\beta$ , ° | $\gamma$ , ° | R <sub>p</sub> , % | R <sub>wp</sub> , % | R <sub>exp</sub> , % | $\chi^2$ |
|----------------------|-----------|-----------|------------|--------------|-------------|--------------|--------------------|---------------------|----------------------|----------|
| NFP/C/rGO (2.5 wt.%) | 6.4375(5) | 9.4237(8) | 11.0215(8) | 64.420(4)    | 85.583(5)   | 72.800(5)    | 1.47               | 1.95                | 1.26                 | 2.50     |
| NFP/C/rGO (2.0 wt.%) | 6.4353(7) | 9.424(1)  | 11.017(1)  | 64.454(5)    | 85.648(7)   | 72.832(6)    | 1.63               | 2.21                | 1.21                 | 3.34     |
| NFP/C/rGO (1.5 wt.%) | 6.4322(5) | 9.4225(7) | 11.0214(8) | 64.382(4)    | 85.598(5)   | 72.850(4)    | 1.62               | 2.21                | 1.22                 | 3.28     |
| NFP/C/rGO (0.5 wt.%) | 6.4359(8) | 9.423(1)  | 11.022(1)  | 64.417(6)    | 85.632(8)   | 72.849(7)    | 1.43               | 2.05                | 0.79                 | 6.73     |
| NFP/C                | 6.4353(6) | 9.4278(9) | 11.0172(1) | 64.438(5)    | 85.665(6)   | 72.874(5)    | 1.54               | 2.07                | 1.30                 | 2.54     |
| NFP/rGO (2.5 wt.%)   | 6.4330(4) | 9.4158(5) | 11.0188(6) | 64.433(3)    | 85.649(4)   | 72.837(3)    | 1.95               | 2.82                | 1.21                 | 5.43     |
| NFP                  | 6.4449(3) | 9.4713(4) | 10.9963(4) | 64.835(2)    | 86.250(3)   | 73.177(3)    | 1.51               | 2.19                | 1.19                 | 3.39     |

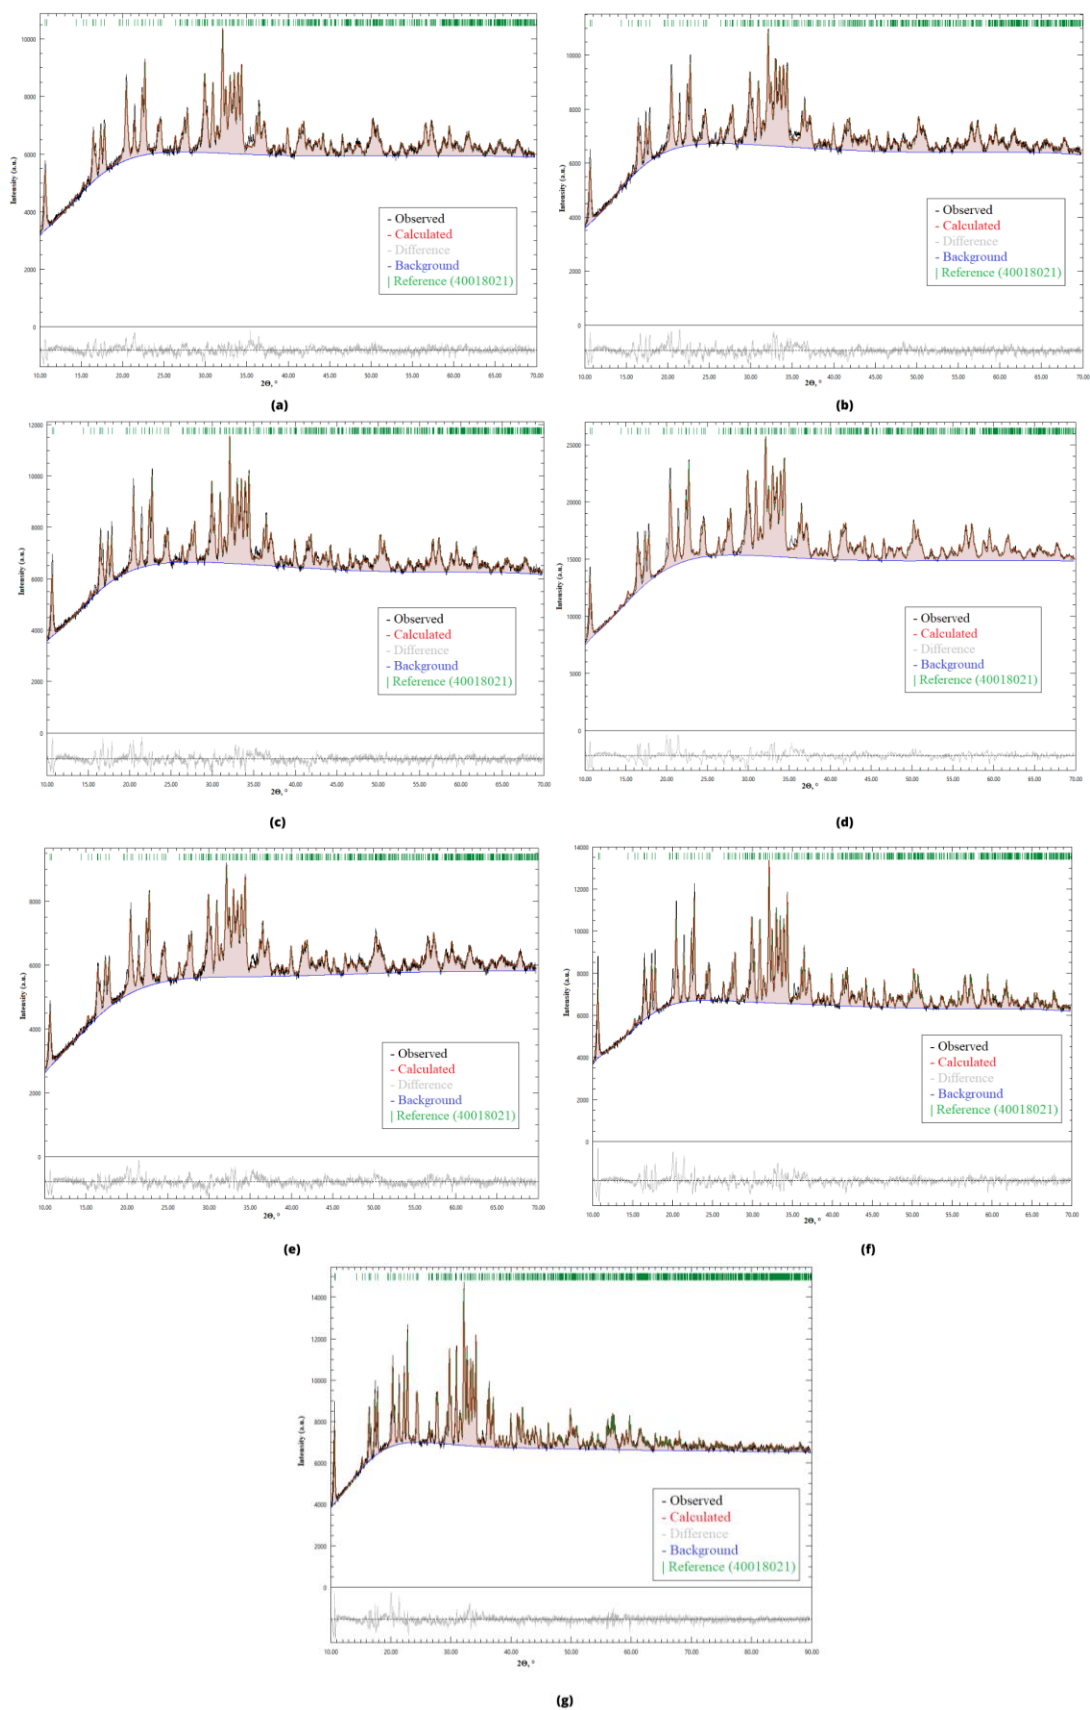

**Figure S1.** Rietveld refinement of the XRD patterns of (a) NFP/C/rGO (2.5 wt.%), (b) NFP/C/rGO (2.0 wt.%), (c) NFP/C/rGO (1.5 wt.%), (d) NFP/C/rGO (0.5 wt.%), (e) NFP/C, (f) NFP/rGO (2.5 wt.%), (g) NFP

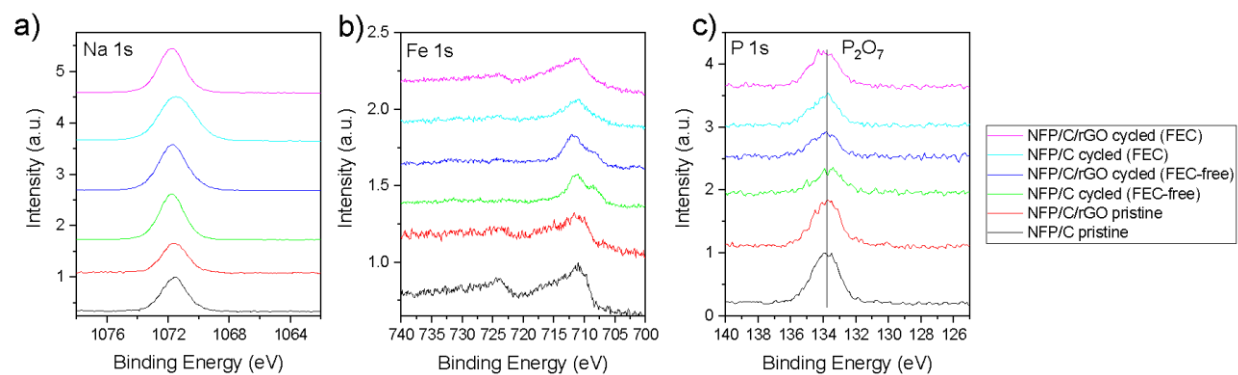

**Figure S2.** XPS spectra of fresh NFP/C and NFP/C/rGO electrodes as well as electrodes cycled in FEC-free and 5 wt.% FEC-containing 1 M NaClO<sub>4</sub> (PC) electrolyte: (a) Na 1s, (b) Fe 1s and (c) P 1s.
